# Supplementary material
Source: Springer Nature journal article supplement (https://www.springermedizin.de/resource/supplementary/12879_2011_1911_MOESM1_ESM.pdf/9444014)

G T G C G T G C C A A

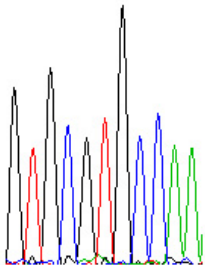

A

G T G C G T G C C A A

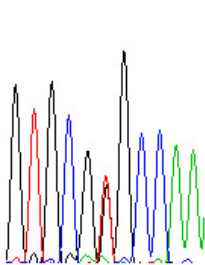

B

G T G C G G G C C A A

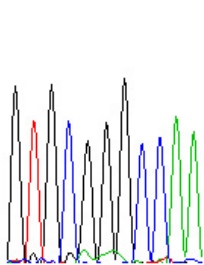

C

Supplement: MOESM1 [file 9444014]
